# Supplementary material for: Impact of patient characteristics on the risk of influenza/ILI-related complications
Source: Springer Nature journal article supplement (doi:10.1186/1472-6963-1-8), 2001-08-21
Supplement: Additional file 1 [file 1472-6963-1-8-s1.doc]

### Appendix A

### ICD-9 Codes for Influenza-Related Complications and Manifestations

| Category/ ICD-9 Codes | Descriptions |
| --- | --- |
| Respiratory Diseases |  |
| 460 | Acute Nasopharyngitis (Common Cold) |
| 461 | Acute Sinusitis |
| 462 | Acute Pharyngitis |
| 463 | Acute Tonsillitis |
| 464 | Acute Laryngitis and Tracheitis |
| 465 | Acute Upper Respiratory Infections of Multiple or Unspecified Sites |
| 466 | Acute Bronchitis and Bronchiolitis |
| 472 | Chronic Pharyngitis and Nasopharyngitis |
| 473 | Chronic Sinusitis |
| 474 | Chronic Disease of Tonsils and Adenoids |
| 475 | Peritonsillar Abscess |
| 478 | Other Diseases of Upper Respiratory Tract |
| 480 | Viral Pneumonia |
| 481 | Pneumococcal Pneumonia |
| 482 | Other bacterial pneumonia |
| 483 | Pneumonia due to other specified organisms |
| 484 | Pneumonia in Infectious Disease Classified Elsewhere |
| 485 | Bronchopneumonia, organism unspecified |
| 486 | Pneumonia, organism unspecified |
| 490 | Bronchitis |
| 491 | Chronic Bronchitis |
| 492 | Emphysema |
| 493 | Asthma |
| 494 | Bronchiectasis |
| 496 | Chronic Airway Obstruction |
| 510 | Empyema |
| 511 | Pleurisy |
| 512 | Pneumothorax |
| 513 | Abscess of Lung and Mediastinum |
| 516 | Other Alveolar and Parietoalveolar Pneumonopathy |
| 517 | Lung Involvement in Conditions Classified Elsewhere |
| 518 | Diseases of Lung |
| 519 | Diseases of Respiratory System |

| Category/ ICD-9 Codes | Descriptions |
| --- | --- |
| Cardiovascular Diseases | |
| 410 | Acute Myocardial Infarction |
| 411 | Other Acute and Sub-acute Forms of Ischemic Heart Disease |
| 413 | Angina Pectoris |
| 414 | Other forms of Chronic Heart Disease |
| 420 | Acute Pericarditis |
| 422 | Acute Myocarditis |
| 425 | Cardiomyopathy |
| 428 | Heart Failure |
| 429.0 | Myocarditis Unspecified |
| Infectious Diseases |  |
| 034 | Steptococcal Sore Throat |
| 075 | Infectious Mononucleosis |
| 079.9 | Unspecified Viral Infection |
| Other Diseases |  |
| 250 | Diabetes |
| 251 | Disorders of Pancreatic Internal Secretion |
| 276 | Disorders of Fluid Electrolyte and Acid-Base Balance |
| 331.81 | Reye’s Syndrome |
| 348.3 | Encephalopathy, Unspecified |
| 357.0 | Acute Infective Polyneuritis – Guillan-Barré Syndrome |
| 372 | Disorders of Conjunctiva |
| 380 | Disorders of External Ear |
| 381 | Nonsuppurative Otitis Media and Eustachian Tube Disorders |
| 382 | Suppurative and Unspecified Otitis Media |
| 383 | Mastoiditis and Related Conditions |
| 558 | Other Noninfectious Gastroenteritis and Colitis |
| Musculoskeletal Diseases |  |
| 719 | Other Unspecified Disorders of the Joint |
| 724 | Other Unspecified Disorders of the Back |
| 728 | Disorders of Muscles, Ligaments and Fascia |
| 729 | Other Disorders of Soft Tissue |
| Symptoms |  |
| 780 | General Symptoms |
| 781 | Symptoms involving Nervous and Musculoskeletal Systems |
| 784 | Symptoms involving Head and Neck |
| 786 | Symptoms involving Respiratory System and other Chest Symptoms |
| 787 | Symptoms involving Digestive System |
| 789 | Symptoms involving Abdomen and Pelvis |
